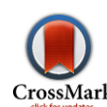

# Carvedilol for Prevention of Atrial Fibrillation after Cardiac Surgery: A Meta-Analysis

Hui-Shan Wang\*, Zeng-Wei Wang, Zong-Tao Yin

Department of Cardiovascular Surgery, Shenyang Northern Hospital, Shenyang, Liaoning Province, China

## Abstract

**Background:** Postoperative atrial fibrillation (POAF) remains the most common complication after cardiac surgery. Current guidelines recommend  $\beta$ -blockers to prevent POAF. Carvedilol is a non-selective  $\beta$ -adrenergic blocker with anti-inflammatory, antioxidant, and multiple cationic channel blocking properties. These unique properties of carvedilol have generated interest in its use as a prophylaxis for POAF.

**Objective:** To investigate the efficacy of carvedilol in preventing POAF.

**Methods:** PubMed from the inception to September 2013 was searched for studies assessing the effect of carvedilol on POAF occurrence. Pooled relative risk (RR) with 95% confidence interval (CI) was calculated using random- or fixed-effect models when appropriate. Six comparative trials (three randomized controlled trials and three nonrandomized controlled trials) including 765 participants met the inclusion criteria.

**Results:** Carvedilol was associated with a significant reduction in POAF (relative risk [RR] 0.49, 95% confidence interval [CI] 0.37 to 0.64,  $p < 0.001$ ). Subgroup analyses yielded similar results. In a subgroup analysis, carvedilol appeared to be superior to metoprolol for the prevention of POAF (RR 0.51, 95% CI 0.37 to 0.70,  $p < 0.001$ ). No evidence of heterogeneity was observed.

**Conclusions:** In conclusion, carvedilol may effectively reduce the incidence of POAF in patients undergoing cardiac surgery. It appeared to be superior to metoprolol. A large-scale, well-designed randomized controlled trial is needed to conclusively answer the question regarding the utility of carvedilol in the prevention of POAF.

**Citation:** Wang H-S, Wang Z-W, Yin Z-T (2014) Carvedilol for Prevention of Atrial Fibrillation after Cardiac Surgery: A Meta-Analysis. PLoS ONE 9(4): e94005. doi:10.1371/journal.pone.0094005

**Editor:** Rudolf Kirchmair, Medical University Innsbruck, Austria

**Received:** November 18, 2013; **Accepted:** March 13, 2014; **Published:** April 4, 2014

**Copyright:** © 2014 Wang et al. This is an open-access article distributed under the terms of the Creative Commons Attribution License, which permits unrestricted use, distribution, and reproduction in any medium, provided the original author and source are credited.

**Funding:** The authors have no support or funding to report.

**Competing Interests:** The authors have declared that no competing interests exist.

\* E-mail: wanghuishanCA@126.com

## Introduction

Despite significant advances in anesthetic and surgical techniques, postoperative atrial fibrillation (POAF) remains the most common complication after cardiac surgery [1–3]. The incidence of POAF varies from 11% to 40%, depending on the definition and the method of monitoring [1–3]. Although this arrhythmia is usually benign and self-limiting, it may result in hemodynamic instability, a longer hospital stay, and increased health care costs [1–3]. Given the clinical consequences attributable to POAF, its prevention is of great importance. To date, many pharmacologic approaches have been attempted to prevent POAF, for example,  $\beta$ -blockers, amiodarone, and magnesium [4]. Most reviews reflect a growing consensus in favor of the prophylactic administration of  $\beta$ -blockers for cardiac surgery patients [5]. In addition, updated American College of Cardiology/American Heart Association (ACC/AHA) 2006 guidelines recommend  $\beta$ -blockers for the prevention of POAF [6].

Despite the extensive studies, the exact pathophysiology of POAF is for the moment far from being fully elucidated [1–3]. A growing body of evidence suggests that markers of

inflammation and oxidative injury are elevated in atrial fibrillation patients [7–10]. Carvedilol, a non-selective  $\beta$ -adrenergic blocking agent approved for use in heart failure cases, has a number of ancillary activities including anti-inflammatory and antioxidant properties [11,12]. Moreover, unlike other beta-blockers, carvedilol antagonizes the rapid-depolarizing sodium channel, the human ether-a-go-go-related gene potassium channel, and the L-type calcium channel [11,12], which suggests a pharmacologic profile similar to amiodarone, a proven anti-arrhythmic agent for the prevention of POAF [13]. Theoretically, this should reduce the incidence of arrhythmia, including POAF. All these properties of carvedilol have generated interest in its use as a prophylactic agent for POAF. Recently, several relevant studies regarding prophylactic carvedilol in preventing POAF have been published [14–19]. However, the role of carvedilol in preventing POAF remains unknown. We therefore undertook a meta-analysis of published studies to the efficacy of carvedilol in preventing POAF for adult patients undergoing cardiac surgery.

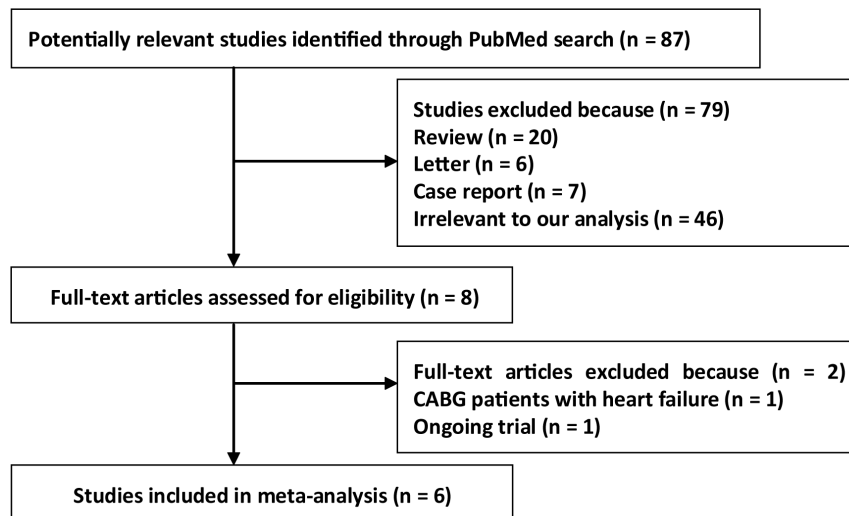

**Figure 1. Selection process for clinical trials.**  
doi:10.1371/journal.pone.0094005.g001

## Methods

### Literature search and inclusion criteria

Two investigators searched PubMed database for relevant articles published up to September 2013. The initial search terms were carvedilol and atrial fibrillation. No language restriction was imposed. In addition, the reference lists of identified studies were manually checked to include other potentially eligible trials. This process was performed iteratively until no additional articles could be identified.

The following inclusive selection criteria were applied: (i) study design: comparative trial; (ii) study population: adult patients undergoing cardiac surgery; (iii) intervention: carvedilol (no matter what regimen applied); (iv) comparison intervention: control (placebo or other beta-blockers) and (v) outcome measure: the incidence of POAF.

### Data extraction and outcome measures

Two investigators independently extracted the following data from each trial: first author, publication year, number of patients (carvedilol/control), patient characteristic, regimen of intervention (carvedilol/control), definition and monitoring of POAF, study design, the incidence of POAF, and length of hospital stay (LOS). Extracted data were entered into a standardized Excel file. The primary outcome was the incidence of POAF. Secondary outcome included LOS.

### Statistical analysis

Differences were expressed as relative risks (RRs) with 95% confidence intervals (CIs) for dichotomous outcomes, and weighted mean differences (WMDs) with 95% CIs for continuous outcomes. Heterogeneity across studies was tested by using the  $I^2$  statistic, which was a quantitative measure of inconsistency across studies. Studies with an  $I^2$  statistic of 25% to 50% were considered to have low heterogeneity, those with an  $I^2$  statistic of 50% to 75% were considered to have moderate heterogeneity, and those with an  $I^2$  statistic of >75% were considered to have a high degree of heterogeneity [20]. An  $I^2$  value greater than 50% indicates significant heterogeneity [21]. A fixed-effects model was used ( $I^2 \leq 50\%$ ), and a random-effects model was used in the case of significant heterogeneity ( $I^2 > 50\%$ ). We further conducted

subgroup analyses according to type of control, surgery type, and study design. We also investigated the influence of a single study on the overall risk estimate by omitting one study in each turn. We did not assess publication bias [22], because the pooled estimate included fewer than ten trials. A  $p$  value  $< 0.05$  was considered statistically significant. All statistical analyses were performed using Stata version 11.0 (Stata Corporation, College Station, Texas, USA).

## Results

### Study identification and selection

The initial search yielded 87 relevant publications of which 79 were excluded for various reasons (review, letter, case report, or irrelevant to the current analysis) based on the titles and abstracts. The remaining eight were then retrieved for full text review, two of them were also excluded because one was focused in patients undergoing coronary bypass graft with heart failure and one was currently ongoing [23,24]. Thus, six studies were included in the final analysis [14–19]. The flowchart of studies included in meta-analysis was shown in Figure 1.

### Study characteristics

The basic characteristics of studies included in the meta-analysis are shown in Table 1. These studies were published between 2003 and 2010. The sample size of these studies ranged from 53 to 207 (total 765). Four studies in this meta-analysis enrolled patients undergoing coronary artery bypass grafting (CABG) only [15–18]. The remaining two included patients undergoing CABG and/or valve surgery [14,19]. Carvedilol was administered orally by different regimens and formulations. Timing of initiation for carvedilol prophylaxis was 3–10 days before the surgery in the preoperative prophylaxis studies [15,16,19] and within 24 hours of surgery in the postoperative group [17,18]. Definition of POAF in terms of duration varied among the studies. All the patients were monitored using electrocardiography.

### Primary outcome: POAF

The definition and monitoring of POAF in each trial are summarized in Table 2. Overall, six studies including 765 patients were included in this analysis (356 in the carvedilol group and 409

**Table 1.** Characteristics of studies included in the meta-analysis.

| Study (Reference)  | Sample size (Carvedilol/Control) | Patient characteristic                   | Mean age (year)/Male (%) | Regimen of intervention                                                                                                                                   |                                                                                                                                                                    | POAF       |         | LOS (days) |           | Study design |
|--------------------|----------------------------------|------------------------------------------|--------------------------|-----------------------------------------------------------------------------------------------------------------------------------------------------------|--------------------------------------------------------------------------------------------------------------------------------------------------------------------|------------|---------|------------|-----------|--------------|
|                    |                                  |                                          |                          | Carvedilol                                                                                                                                                | Control                                                                                                                                                            | Carvedilol | Control | Carvedilol | Control   |              |
| Merritt 2003 [14]  | 115(26/89)                       | Adult patients undergoing CABG and/or VS | 60.3/NA                  | NA                                                                                                                                                        | Metoprolol/atenolol                                                                                                                                                | 2/26       | 28/89   | 5.9±1.9    | 6.9±4.5   | Non-RCT      |
| Haghjoo 2007 [15]  | 120(60/60)                       | Adult patients undergoing CABG           | 61/52.5                  | 6.25 mg twice daily, oral, starting from 10 days before surgery, then increasing until to the maximum                                                     | Metoprolol 25 mg twice daily, oral, starting from 10 days before surgery, then increasing until to the maximum                                                     | 9/60       | 20/60   | NA         | NA        | RCT          |
| Acikel 2008 [16]   | 110(55/55)                       | Adult patients undergoing CABG           | 60/71.8                  | 12.5 mg twice daily, starting on 3 days prior to surgery, lasting to the morning of surgery, then titrating according to hemodynamic responses after CABG | Metoprolol 50 mg twice daily, starting on 3 days prior to surgery, lasting to the morning of surgery, then titrating according to hemodynamic responses after CABG | 9/55       | 20/55   | NA         | NA        | RCT          |
| Tsuboi 2008 [17]   | 160(80/80)                       | Adult patients undergoing CABG           | 66.5/70.6                | 5 or 10 mg/day, oral, starting on postoperative days 1 or 2, then increasing until to the maximum                                                         | Placebo                                                                                                                                                            | 12/80      | 27/80   | 17.0±6.2   | 22.0±12.3 | Non-RCT      |
| Yoshioka 2009 [18] | 53(31/22)                        | Adult patients undergoing CABG           | 67/68                    | 2.5 mg/day, oral, starting on postoperative days 1 or 2                                                                                                   | Placebo                                                                                                                                                            | 4/31       | 7/22    | NA         | NA        | Non-RCT      |
| Ozaydin 2013 [19]  | 207(104/103)                     | Adult patients undergoing CABG and/or VS | 63/72.5                  | 6.25 mg twice daily, starting from 7 days before surgery, if not tolerated, a 3.125 mg twice daily dose was given                                         | Metoprolol 50 mg once daily dose, starting from 7 days before surgery, if not tolerated, a 25 mg twice daily dose was given                                        | 25/104     | 37/103  | NA         | NA        | RCT          |

CABG, coronary artery bypass grafting; LOS, length of hospital stay; NA, no data available; POAF, postoperative atrial fibrillation; RCT, randomized controlled trial; VS, valve surgery.  
doi:10.1371/journal.pone.0094005.t001

**Table 2.** Definition and monitoring of POAF.

| Study (Reference)  | Definition of POAF                                                                                                                                                        | Monitoring of POAF                                                                                    |
|--------------------|---------------------------------------------------------------------------------------------------------------------------------------------------------------------------|-------------------------------------------------------------------------------------------------------|
| Merritt 2003 [14]  | NA                                                                                                                                                                        | NA                                                                                                    |
| Haghjoo 2007 [15]  | Absent P wave before the QRS complex together with irregular ventricular rhythm on the rhythm strips, lasting longer than 5 minute.                                       | ECG and 12-lead ECG were need to confirm                                                              |
| Acikel 2008 [16]   | An irregular rhythm with no prominent P waves lasting 30 s or more                                                                                                        | Automated arrhythmia detectors in cardiac ICU, and simultaneous telemetric display of ECG in the ward |
| Tsuboi 2008 [17]   | Absent consistent P waves before each QRS complex and an irregular ventricular rate and as episodes of atrial fibrillation that persisted for over 10 min.                | 12-lead ECG                                                                                           |
| Yoshioka 2009 [18] | Lasted more than 5 minutes or required intervention for angina or hemodynamic compromise, or any episode that required intervention for angina or hemodynamic compromise. | Monitoring system on a rhythm strip or 12-lead ECG                                                    |
| Ozaydin 2013 [19]  | An irregular rhythm with the absence of discrete P-waves lasting 5 min during hospitalization                                                                             | Continuous ECG monitoring and all-day Holter                                                          |

ECG, electrocardiogram; NA, no data available; POAF, postoperative atrial fibrillation; ICU, intensive care unit.  
doi:10.1371/journal.pone.0094005.t002

in the control group). Meta-analysis of six studies using a fixed-effects model suggested that carvedilol significantly reduced the incidence of POAF in patients undergoing cardiac surgery compared with control (RR 0.49, 95% CI 0.37 to 0.64,  $p < 0.001$ ; Figure 2). There was no heterogeneity among the studies ( $I^2 = 0\%$ , heterogeneity  $p = 0.645$ ; Figure 2).

Then we further conducted subgroup analyses based on type of control (metoprolol vs. placebo), surgery type (CABG and/or valve surgery vs. CABG only), and study design (randomized trials vs. nonrandomized trials). Table 3 shows the results of subgroup analyses for POAF. The results suggested that carvedilol appeared to be superior to metoprolol for the prevention of POAF (RR 0.51, 95% CI 0.37 to 0.70,  $p < 0.001$ ;

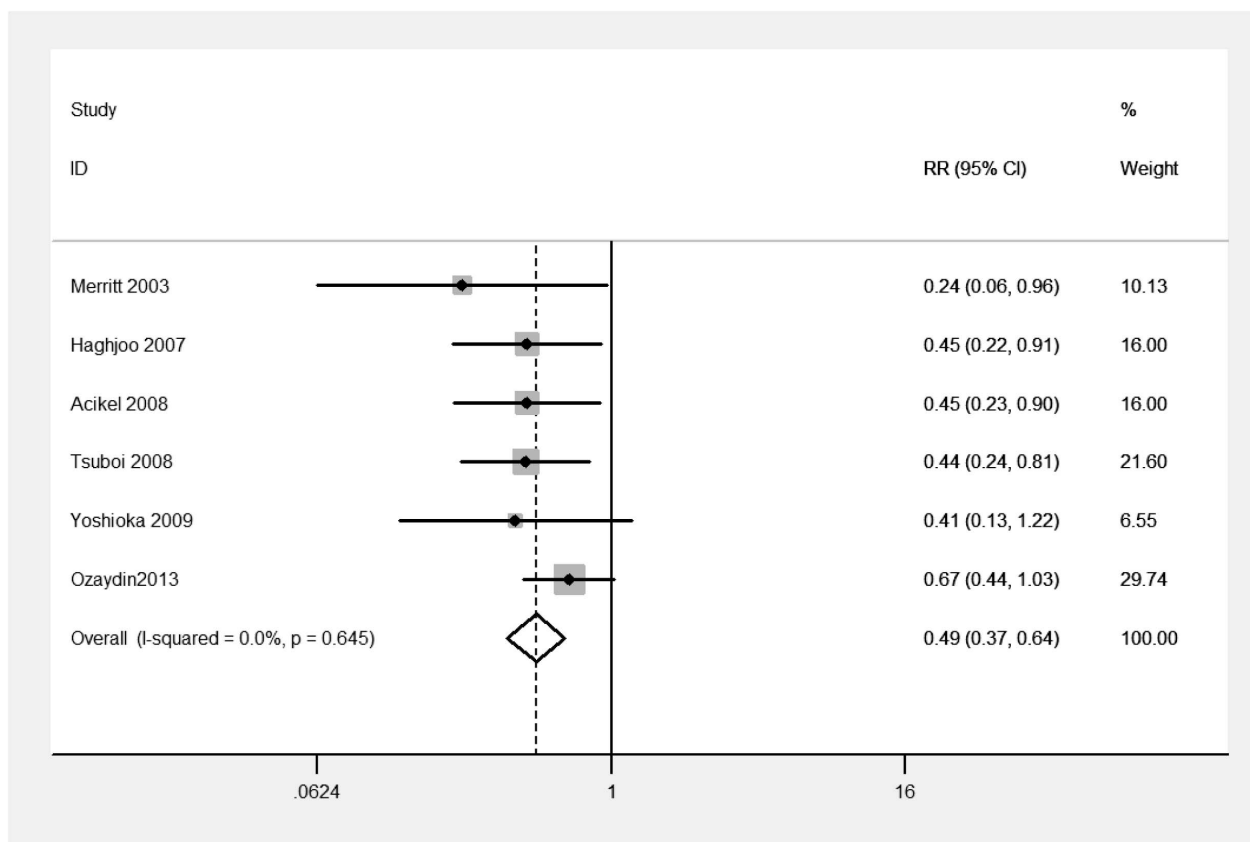**Figure 2.** Effect of carvedilol versus control on the incidence of postoperative atrial fibrillation.

doi:10.1371/journal.pone.0094005.g002

**Table 3.** Results of subgroup analyses for POAF.

| Subgroup analysis                 | n (N)   | Carvedilol | Control | OR (95% CI)      | p value | I <sup>2</sup> (%) | Heterogeneity p |
|-----------------------------------|---------|------------|---------|------------------|---------|--------------------|-----------------|
| Study design                      |         |            |         |                  |         |                    |                 |
| RCTs [15,16,19]                   | 3 (437) | 43/219     | 77/218  | 0.56 (0.40–0.77) | <0.001  | 0                  | 0.489           |
| Non-RCTs [14,17,18]               | 3 (328) | 18/137     | 62/191  | 0.38 (0.23–0.64) | <0.001  | 0                  | 0.723           |
| Surgery type                      |         |            |         |                  |         |                    |                 |
| CABG and/or valve surgery [14,19] | 2 (322) | 27/130     | 65/192  | 0.56 (0.37–0.85) | 0.007   | 51.7               | 0.15            |
| CABG only [15–18]                 | 4 (443) | 34/226     | 74/217  | 0.44 (0.31–0.64) | <0.001  | 0                  | 0.999           |
| Type of comparison                |         |            |         |                  |         |                    |                 |
| Metoprolol [14–16,19]             | 4 (552) | 45/245     | 105/307 | 0.51 (0.37–0.70) | <0.001  | 0                  | 0.408           |
| Placebo [17,18]                   | 2 (213) | 16/111     | 34/102  | 0.44 (0.26–0.74) | 0.002   | 0                  | 0.886           |

CABG, coronary artery bypass grafting; RCT, randomized controlled trial; n, number of patients; N, number of trials.  
doi:10.1371/journal.pone.0094005.t003

Figure 3). No evidence of heterogeneity was observed in subgroup analysis. Influence analysis suggested exclusion of any single study did not materially alter the overall combined RR, with a range from 0.41 (0.29 to 0.59) to 0.52 (0.39 to 0.68), which adds robustness to our results.

### Secondary outcome: LOS

Two trials reported the effect of carvedilol on LOS and provided available data (expressed as mean  $\pm$  standard deviation) with a total of 275 patients. The combined analysis using a random-effects model showed that carvedilol did not significantly reduce LOS (WMD  $-2.75$ , 95% CI  $-6.64$  to  $1.14$ ,  $p = 0.17$ ), with

a high degree of heterogeneity between the trials ( $I^2 = 82.9\%$ , heterogeneity  $p = 0.016$ ).

### Publication bias

Publication bias was not assessed because of the limited number (below 10) of studies included in the analysis.

### Discussion

Meta-analysis of all six included studies using a fixed-effects model illustrates that carvedilol may effectively reduce the incidence of POAF in adult patients undergoing cardiac surgery.

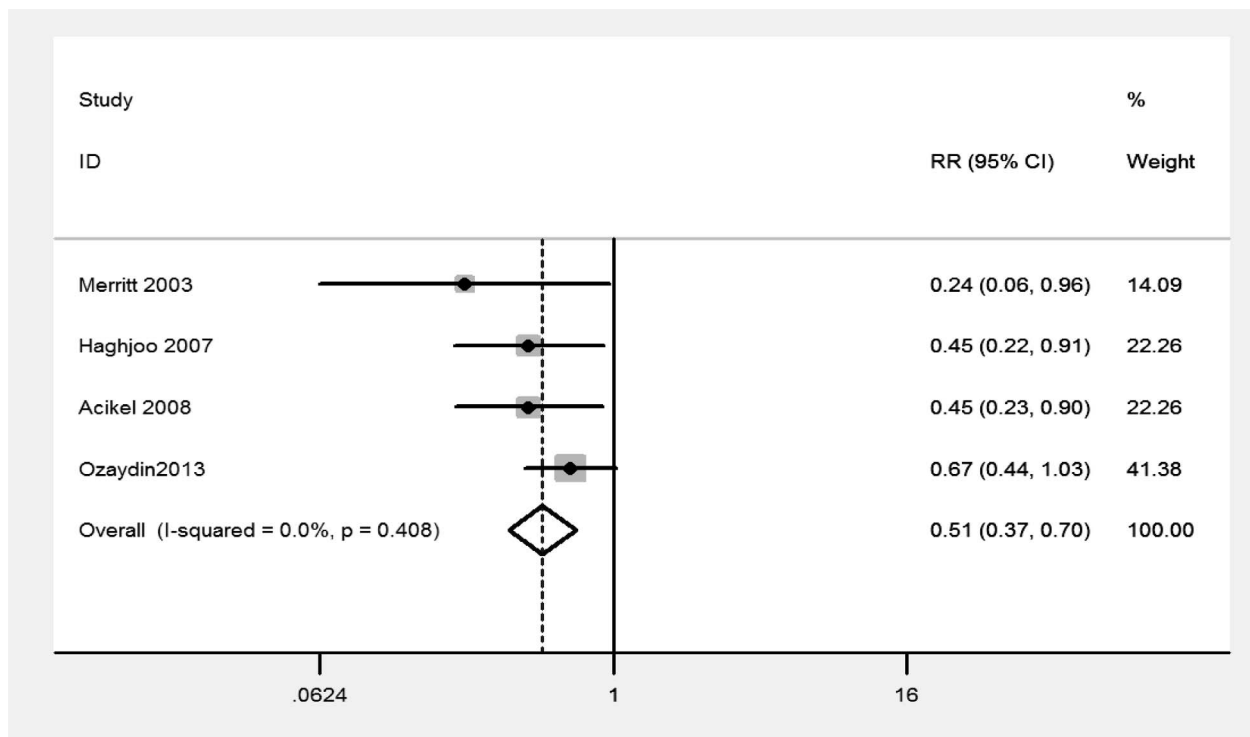**Figure 3.** Effect of carvedilol versus metoprolol on the incidence of postoperative atrial fibrillation.

doi:10.1371/journal.pone.0094005.g003

The mechanisms that carvedilol reduces the incidence of POAF are not entirely known. However, there is now an increasing body of evidences that oxidative stress [25], and inflammation [26,27], and increased sympathetic activation [28] are involved in the pathogenesis of POAF. Carvedilol is a  $\beta$  blocker with antioxidant and anti-inflammatory properties [11,12], and reduces sympathetic activity [29]. From a pathophysiological point of view, it is plausible that the abovementioned properties of carvedilol might result in the favorable effect on the prevention of POAF.

Recently, Khan et al carried out a meta-analysis of randomized controlled trials and confirmed the efficacy of prophylactic  $\beta$ -blockers against POAF [30]. Both the Khan meta-analysis and our meta-analysis showed that carvedilol appeared to be more effective than metoprolol for the prevention of POAF. Compared with metoprolol, carvedilol has been shown to increase the levels of antioxidant enzymes (superoxide dismutase and glutathione peroxidase). Moreover, carvedilol may have direct antiarrhythmic profile through electrophysiological traits, since it blocks multiple cationic channels ( $\text{Na}^+$ ,  $\text{K}^+$ , and  $\text{Ca}^{2+}$ ) [11,12]. These properties of carvedilol, which are not equally shared by metoprolol, may partly explained superior efficacy of carvedilol in preventing POAF. In addition, numerous trials indicate that carvedilol is better than conventional  $\beta$ 1-selective  $\beta$  blockers on reducing sympathetic activation, a risk factor for atrial fibrillation [28,29].

In this meta-analysis carvedilol did not significantly reduce the LOS. The total incidence of POAF is 26.1% (200 of 765), less than one-third of patients develop POAF and still fewer develop prolonged atrial fibrillation, so the effect of carvedilol on LOS in patients prone to atrial fibrillation would have to be very large to be able to detect an effect of LOS in the total population. In addition, a relatively small number of samples (only two studies) provided available data on LOS, additional studies or data are warranted.

One problem with the use of carvedilol to prevent POAF is that the majority of patients does not develop POAF after cardiac surgery but would still be exposed to possible side effects. In this meta-analysis, two trials reported carvedilol was well tolerated and side effects attributable to carvedilol were detected. And one trial reported complication rates were similar between carvedilol and

control groups, including postoperative myocardial infarction and renal dysfunction.

Several potential limitations of this meta-analysis merit consideration. First, our study included only six studies and some of them have a modest sample size. Overestimation of the treatment effect is more likely in smaller studies compared with larger samples. Second, our analysis is based on six clinical studies, and half of them were non-randomized controlled trials. The targeted population, adopted carvedilol protocols, type of control, and study design differed among the included studies. These factors may result in the heterogeneity and have potential impact on our results. Furthermore, these studies lack homogeneity in both the method of postoperative monitoring and in their definition of POAF. This may lead to potential underestimation and/or overestimation of the true incidence of POAF. Finally, it was possible that some missing and unpublished data may lead to bias in effect size.

In conclusion, despite its various limitations, our study is clinically valuable because it revealed that carvedilol leads to lower incidence of POAF than control and appears to be superior to metoprolol as the current study clearly delineated. Carvedilol may effectively reduce the incidence of POAF in patients undergoing cardiac surgery. On the basis of this encouraging finding, we believe that research on the field is promising and should be continued. At least the ongoing COMPACT [24], which is a prospective, multi-center, randomized, open-label, active-controlled trial, will answer the question of whether or not carvedilol is more superior to metoprolol in preventing POAF in patients undergoing CABG.

## Supporting Information

**Checklist S1** PRISMA Checklist.  
(DOC)

## Author Contributions

Conceived and designed the experiments: HSW ZWW ZTY. Performed the experiments: HSW ZWW ZTY. Analyzed the data: HSW ZWW ZTY. Contributed reagents/materials/analysis tools: HSW ZWW ZTY. Wrote the paper: HSW ZWW ZTY.

## References

- Ommen SR, Odell JA, Stanton MS (1997) Atrial arrhythmias after cardiothoracic surgery. *N Engl J Med* 336:1429–1434.
- Aranki SF, Shaw DP, Adams DH, Rizzo RJ, Couper GS, et al. (1996) Predictors of atrial fibrillation after coronary artery surgery. Current trends and impact on hospital resources. *Circulation* 94:390–397.
- Mathew JP, Fontes ML, Tudor IC, Ramsay J, Duke P, et al. (2004) A multicenter risk for atrial fibrillation after cardiac surgery. *JAMA* 291:1720–1729.
- Burgess DC, Kilborn MJ, Keech AC (2006) Interventions for prevention of postoperative atrial fibrillation and its complications after cardiac surgery: a meta-analysis. *Eur Heart J* 27:2846–2857.
- Eagle KA, Guyton RA, Davidoff R, Edwards FH, Ewy GA, et al. ACC/AHA 2004 guideline update for coronary artery bypass graft surgery: a report of the American College of Cardiology/American Heart Association Task Force on Practice Guidelines (Committee to Update the 1999 Guidelines for Coronary Artery Bypass Graft Surgery). *Circulation* 110:e340–437.
- Fuster V, Rydén LE, Cannom DS, Crijns HJ, Curtis AB, et al. (2011) 2011 ACCF/AHA/HRS focused updates incorporated into the ACC/AHA/ESC 2006 Guidelines for the management of patients with atrial fibrillation: a report of the American College of Cardiology Foundation/American Heart Association Task Force on Practice Guidelines developed in partnership with the European Society of Cardiology and in collaboration with the European Heart Rhythm Association and the Heart Rhythm Society. *J Am Coll Cardiol* 57:e101–198.
- Aviles RJ, Martin DO, Apperson-Hansen C, Houghtaling PL, Rautaharju P, et al. (2003) Inflammation as a risk factor for atrial fibrillation. *Circulation* 108:3006–3010.
- Mihm MJ, Yu F, Carnes CA, Reiser PJ, McCarthy PM, et al. (2011) Impaired myofibrillar energetics and oxidative injury during human atrial fibrillation. *Circulation* 104:174–180.
- Gaudino M, Andreotti F, Zamparelli R, Di Castelnuovo A, Nasso G, et al. (2003) The -174G/C interleukin-6 polymorphism influences postoperative interleukin-6 levels and postoperative atrial fibrillation. Is atrial fibrillation an inflammatory complication? *Circulation* 108 Suppl 1:II195–199.
- Carnes CA, Chung MK, Nakayama T, Nakayama H, Baliga RS, et al. (2001) Ascorbate attenuates atrial pacing-induced peroxynitrite formation and electrical remodeling and decreases the incidence of postoperative atrial fibrillation. *Circ Res* 89:E32–38.
- McBride BF, White CM (2005) Critical differences among beta-adrenoreceptor antagonists in myocardial failure: debating the MERIT of COMET. *J Clin Pharmacol* 45:6–24.
- Stroer AF, Gheorghide M (2004) Carvedilol: beta-blockade and beyond. *Rev Cardiovasc Med* 5 Suppl 1:S18–27.
- Daoud EG, Strickberger SA, Man KC, Goyal R, Deeb GM, et al. (1997) Preoperative amiodarone as prophylaxis against atrial fibrillation after heart surgery. *N Engl J Med* 337:1785–1791.
- Merriitt JC, Niebauer M, Tarakji K, Hammer D, Mills RM (2003) Comparison of effectiveness of carvedilol versus metoprolol or atenolol for atrial fibrillation appearing after coronary artery bypass grafting or cardiac valve operation. *Am J Cardiol* 92:735–736.
- Haghjoo M, Saravi M, Hashemi MJ, Hosseini S, Givtaj N, et al. (2007) Optimal beta-blocker for prevention of atrial fibrillation after on-pump coronary artery bypass graft surgery: carvedilol versus metoprolol. *Heart Rhythm* 4:1170–1174.

16. Acikel S, Bozbas H, Gultekin B, Aydinalp A, Saritas B, et al. (2008) Comparison of the efficacy of metoprolol and carvedilol for preventing atrial fibrillation after coronary bypass surgery. *Int J Cardiol* 126:108–113.
17. Tsuboi J, Kawazoe K, Izumoto H, Okabayashi H (2008) Postoperative treatment with carvedilol, a beta-adrenergic blocker, prevents paroxysmal atrial fibrillation after coronary artery bypass grafting. *Circ J* 72:588–591.
18. Yoshioka I, Sakurai M, Namai A, Kawamura T (2009) Postoperative treatment of carvedilol following low dose landiolol has preventive effect for atrial fibrillation after coronary artery bypass grafting. *Thorac Cardiovasc Surg* 57:464–467.
19. Ozaydin M, Icli A, Yucel H, Akcay S, Peker O, et al. (2013) Metoprolol vs. carvedilol or carvedilol plus N-acetyl cysteine on post-operative atrial fibrillation: a randomized, double-blind, placebo-controlled study. *Eur Heart J* 34:597–604.
20. Higgins JP, Thompson SG, Deeks JJ, Altman DG (2003) Measuring inconsistency in meta-analyses. *BMJ* 327:557–560.
21. Armitage P, Berry G, Matthews JNS (2002) *Analysing Means and Proportions. Statistical Methods in Medical Research.* Oxford, UK: Blackwell Science 83–146.
22. Song F, Eastwood AJ, Gilbody S, Duley L, Sutton AJ (2000) Publication and related biases. *Health Technol Assess* 4:1–115.
23. Marazzi G, Iellamo F, Volterrani M, Caminiti G, Madonna M, et al. (2011) Comparison of effectiveness of carvedilol versus bisoprolol for prevention of postdischarge atrial fibrillation after coronary artery bypass grafting in patients with heart failure. *Am J Cardiol* 107:215–219.
24. Kamei M, Morita S, Hayashi Y, Kanmura Y, Kuro M (2006) Carvedilol versus Metoprolol for the prevention of atrial fibrillation after off-pump coronary bypass surgery: rationale and design of the Carvedilol or Metoprolol Post-Revascularization Atrial Fibrillation Controlled Trial (COMPACT). *Cardiovasc Drugs Ther* 20:219–227.
25. Huang CX, Liu Y, Xia WF, Tang YH, Huang H (2009) Oxidative stress: a possible pathogenesis of atrial fibrillation. *Med Hypotheses* 72:466–467.
26. Kumagai K, Nakashima H, Saku K (2004) The HMG-CoA reductase inhibitor atorvastatin prevents atrial fibrillation by inhibiting inflammation in a canine sterile pericarditis model. *Cardiovasc Res* 62:105–111.
27. Ozaydin M, Dogan A, Varol E, Kapan S, Tuzun N, et al. (2007) Statin use before by-pass surgery decreases the incidence and shortens the duration of postoperative atrial fibrillation. *Cardiology* 107:117–121.
28. Kalman JM, Munawar M, Howes LG, Louis WJ, Buxton BF, et al. (1995) Atrial fibrillation after coronary artery bypass grafting is associated with sympathetic activation. *Ann Thorac Surg* 60:1709–1715.
29. Miranda SM, Mesquita ET, Dohmann HF, Azevedo JC, Barbirato GB, et al. (2010) Effects of short-term carvedilol on the cardiac sympathetic activity assessed by 123I-MIBG scintigraphy. *Arq Bras Cardiol* 94: 308–312, 328–332.
30. Khan MF, Wendel CS, Movahed MR (2013) Prevention of post-coronary artery bypass grafting (CABG) atrial fibrillation: efficacy of prophylactic beta-blockers in the modern era: A meta-analysis of latest randomized controlled trials. *Ann Noninvasive Electrocardiol* 18:58–68.
